# Supplementary material for: A New Theranostic System Based on Endoglin Aptamer Conjugated Fluorescent Silica Nanoparticles
Source: PubMed Central journal article supplement — Theranostics. 2017 Oct 17;7(19):4862–76. doi: 10.7150/thno.19101 (PMC5706105; doi:10.7150/thno.19101), 2017-10-17
Supplement: thnov07p4862s1.pdf [file thnov07p4862s1.pdf]

## Supplementary

**Table S1.** Sequences of synthesized oligonucleotides used in the experiments.

| Sample                             | Sequences (5'→3')                                                                      |
|------------------------------------|----------------------------------------------------------------------------------------|
| YQ26-NH <sub>2</sub>               | TTTTTCCCCGATGCTTTCGCTTTTCCTTCGCTTTTGTTGCTTC<br>GTCCCTGCTTCCTTTCTTG-(NH <sub>2</sub> )  |
| Cy5.5-YQ26                         | (Cy5.5)-TTTTTCCCCGATGCTTTCGCTTTTCCTTCGCTTTTGTT<br>CGCTTCGTCCTGCTTCCTTTCTTG             |
| Lib-NH <sub>2</sub>                | TTTTTCGGCCGTAGCTATTCGCTTTCCTTGCTCTTATGTTGCTTC<br>GTCCCTGCTTCATTCAAC-(NH <sub>2</sub> ) |
| Cy5.5-Lib                          | (Cy5.5)-TTTTTCGGCCGTAGCTATTCGCTTTCCTTGCTCTTATGTT<br>CGCTTCGTCCTGCTTCATTCAAC            |
| Sense primer                       | ATACCAGCTTATTCAATT                                                                     |
| Antisense primer                   | AGATAGTAAGTGCAATCT                                                                     |
| FITC-labeled<br>sense primer       | FITC-ATACCAGCTTATTCA ATT                                                               |
| Biotin-labeled<br>antisense primer | Biotin-AGATAGTAAGTGCAATCT                                                              |

**Table S2.** Sequences and dissociation constants ( $K_d$ ) of candidate aptamers.

| Aptamers | Sequences (5'→3')                                                | $K_d$ (nM)   |
|----------|------------------------------------------------------------------|--------------|
| YQ26     | CCCCCGATGCTTTCGCTTTTCCTTCGCTTTTGTT<br>CGCTTCGTCCCTGCTTCCTTTCTTG  | 26.31 ± 2.51 |
| YQ15     | CGTCGTGCATGTCGTGACTGGTTTTGGTGGGTG<br>GCAAAGAGGGATCGTTGGTCTCGAGTG | 35.55 ± 6.58 |
| YQ23     | CCCCGTTGCTTCCGCCTTTCCTTGCCTTTTGTT<br>CGTTTCGTCCCCGCTTCCTTTCTTG   | 76.7 ± 13.52 |
| YQ30     | CCCCCGATGCTATCGCTTTCCTTTCGCCTTTGTT<br>CGTTTCGTCCCTGCCTCCTTTCTTG  | 46.38 ± 8.13 |

**Table S3.** Size, PDI, zeta-potential, and surface charge of FSiNPs, Lib-FSiNPs, and YQ26- FSiNPs.

| Sample       | Size (nm)    | PDI           | Zeta (mV)     | Aptamer/FSiNPs |
|--------------|--------------|---------------|---------------|----------------|
| FSiNPs       | 70.72 ± 2.62 | 0.131 ± 0.023 | -31.32 ± 3.38 | -              |
| Lib-FSiNPs   | 76.34 ± 3.89 | 0.103 ± 0.016 | -39.04 ± 4.23 | -              |
| YQ26-FSiNPs. | 75.87± 4.12  | 0.099 ± 0.010 | 37.82 ± 4.38  | 363.46 ± 18.56 |

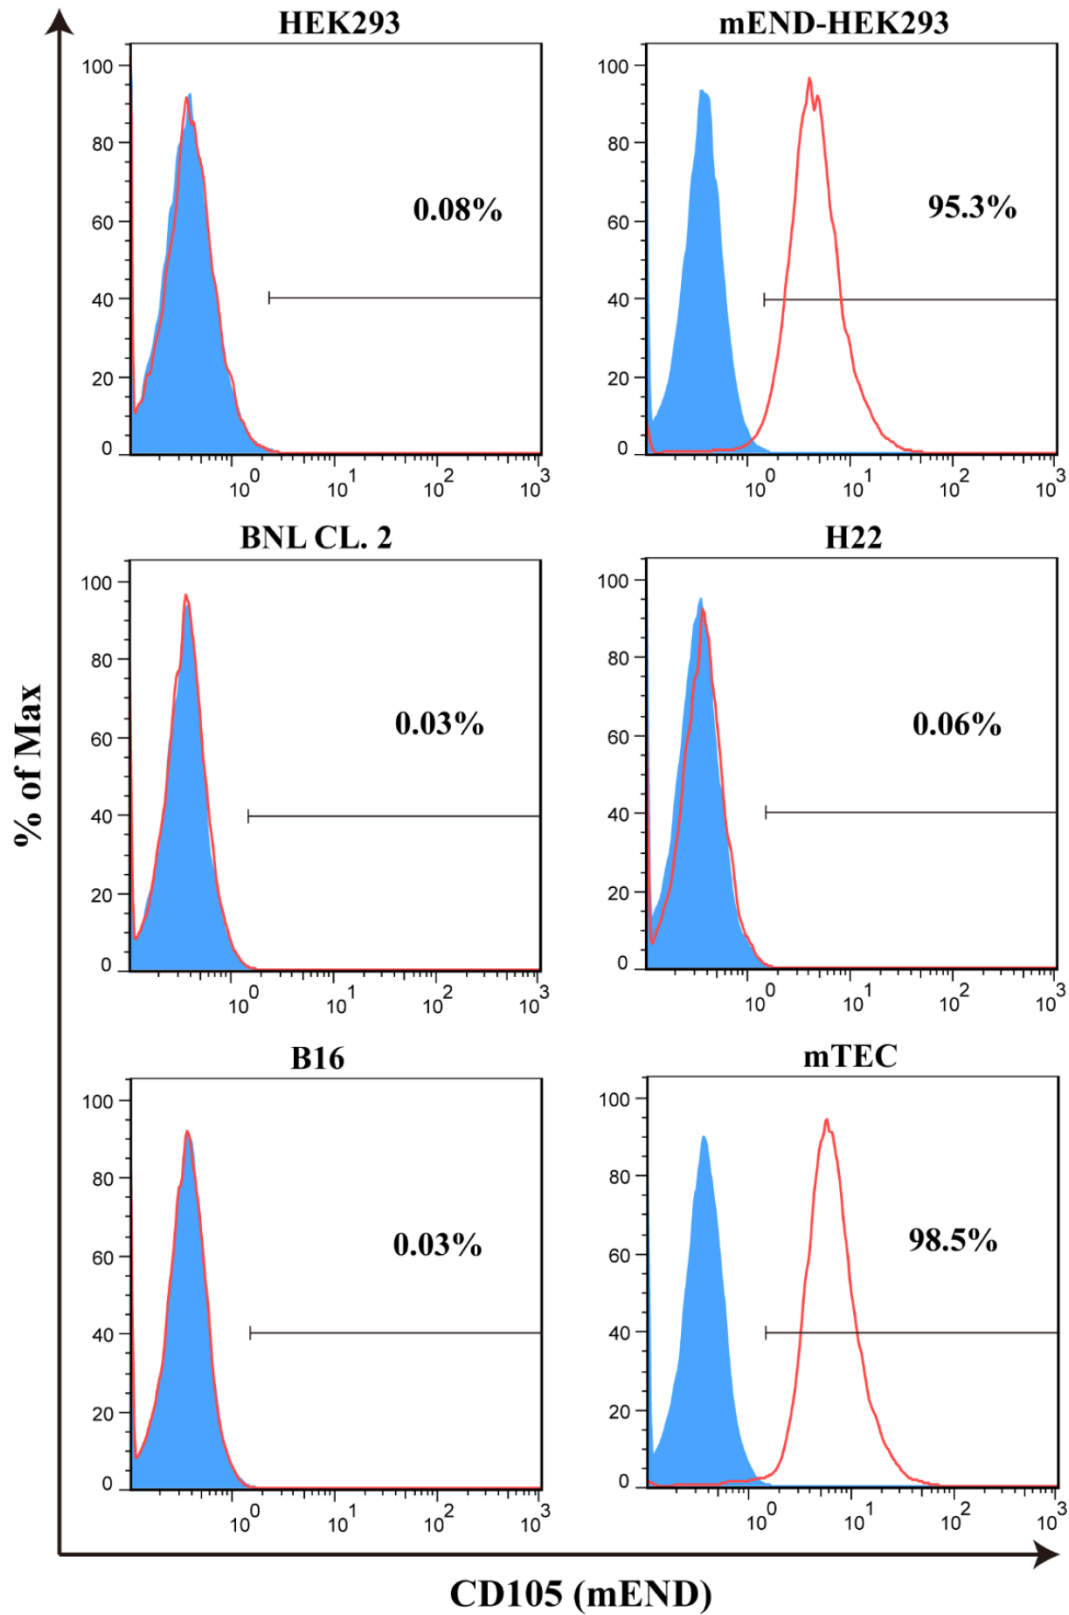

**Figure S1.** Flow cytometric assay for the expression of mEND of HEK293, mEND-HEK293 cells, BNL.CL2, H22, B16, and mTEC cells.

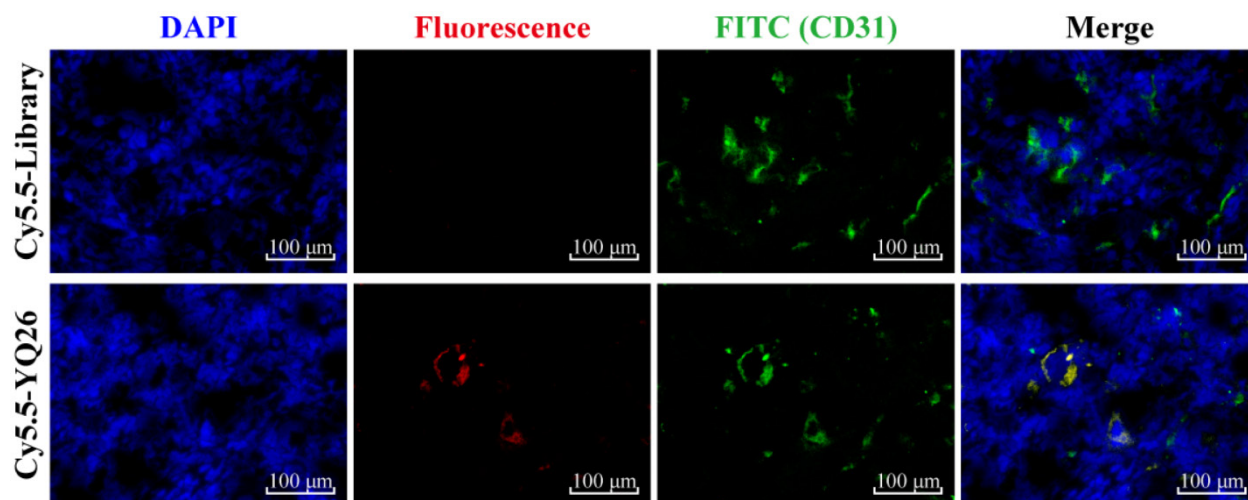

**Figure S2.** Fluorescence imaging of tumor tissue sections after staining with Cy5.5 labeled library or aptamer YQ26 (250 nM) and CD31 (green, with anti-mouse CD31 primary antibody).

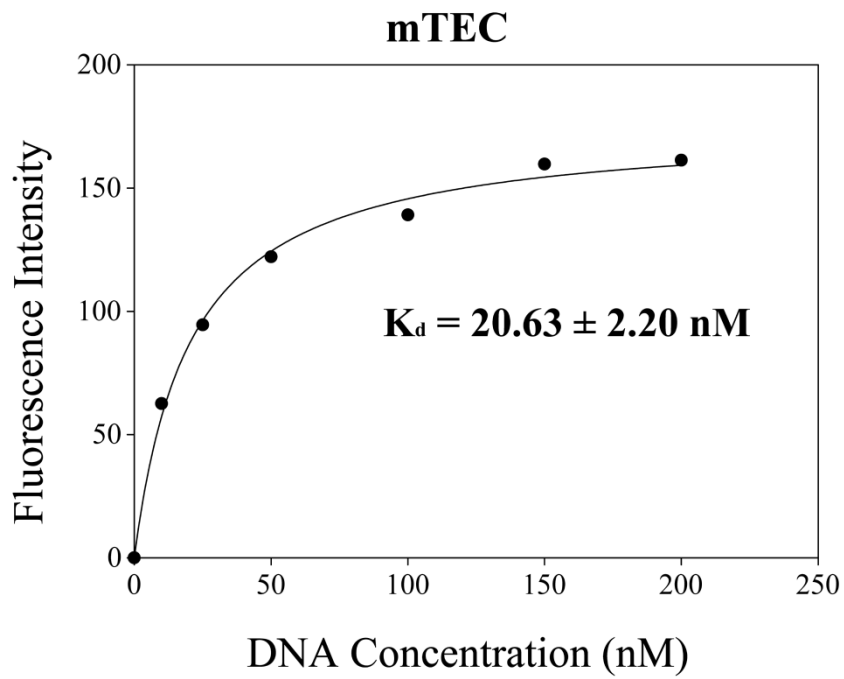

**Figure S3.** Dissociation constant of aptamer YQ26 for mTEC cells.

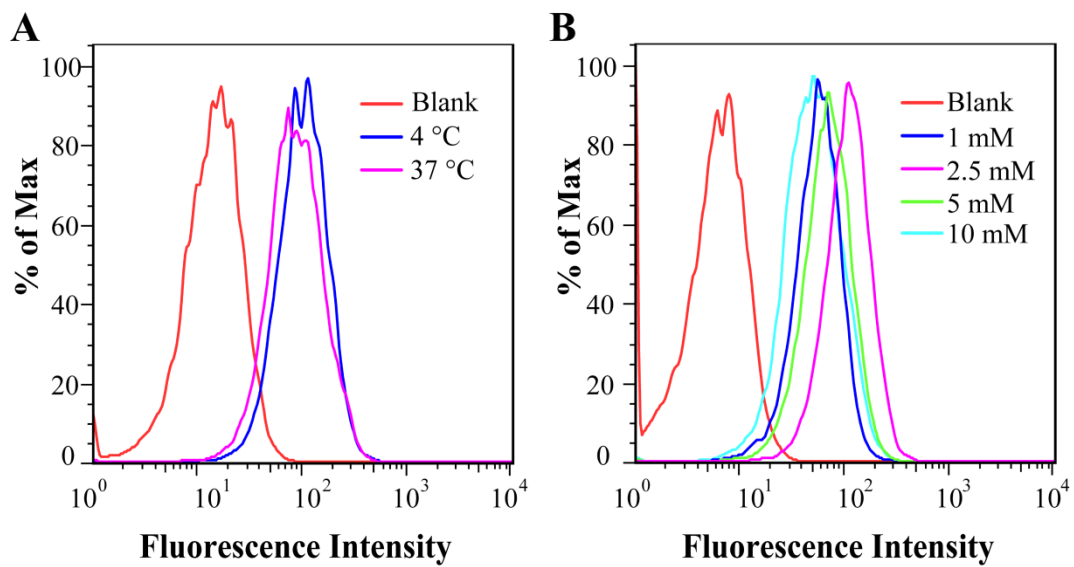

**Figure S4.** The effect of temperature and concentration of Mg<sup>2+</sup> on YQ26-FSiNPs in mTEC cells.



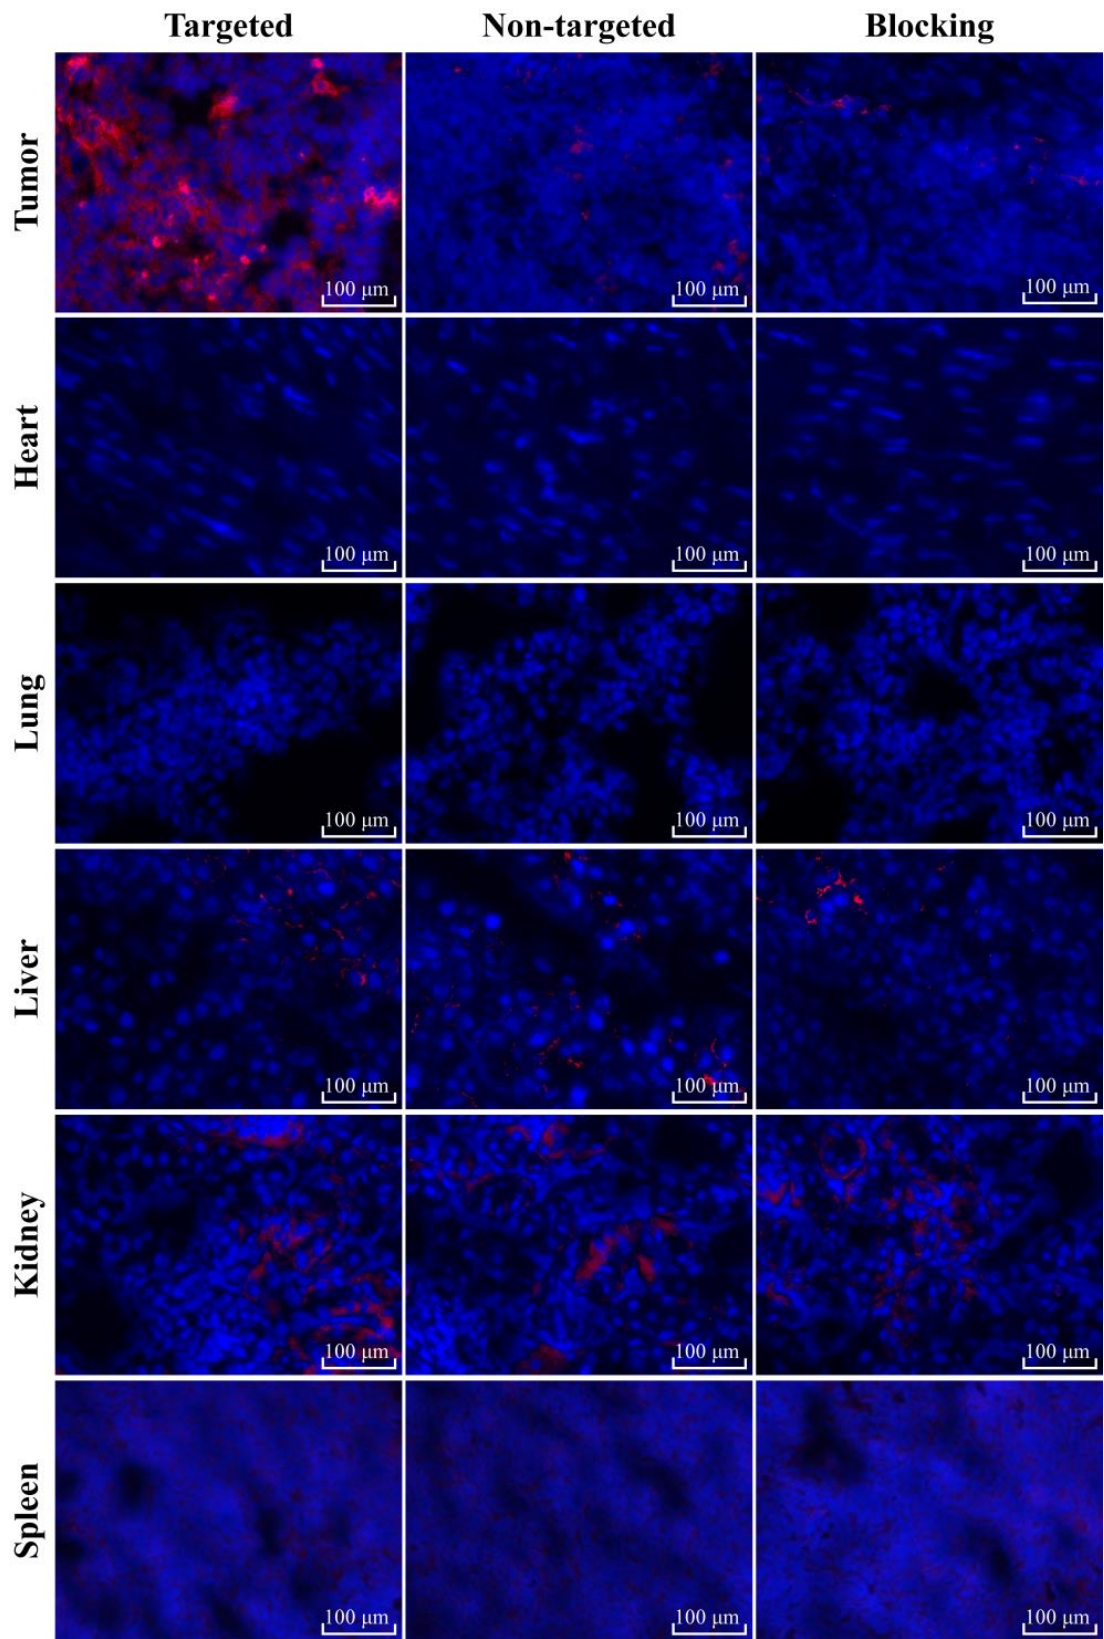

**Figure S5.** Fluorescence images of tissue slices from tumor and important organs at 24 h post-injection of targeted group (END-FSiNPs), non-targeted group (Lib-FSiNPs), or blocking group (END-FSiNPs with excess dose of anti-END).

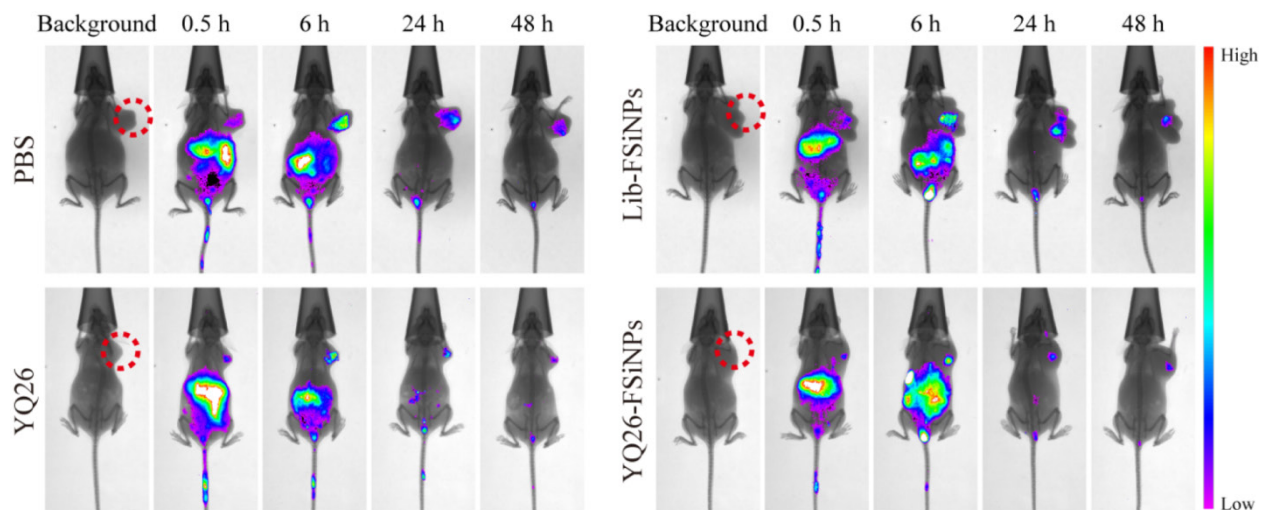

**Figure S6.** *In vivo* imaging of H22 tumor-bearing mice. Time-lapse *in vivo* fluorescence images of at 0.5, 6, 24 and 48 h post injection of YQ26-FSiNPs three weeks after different treatment (PBS, Lib-FSiNPs, YQ26 or YQ26-FSiNPs). The tumors were circled with red dotted line.

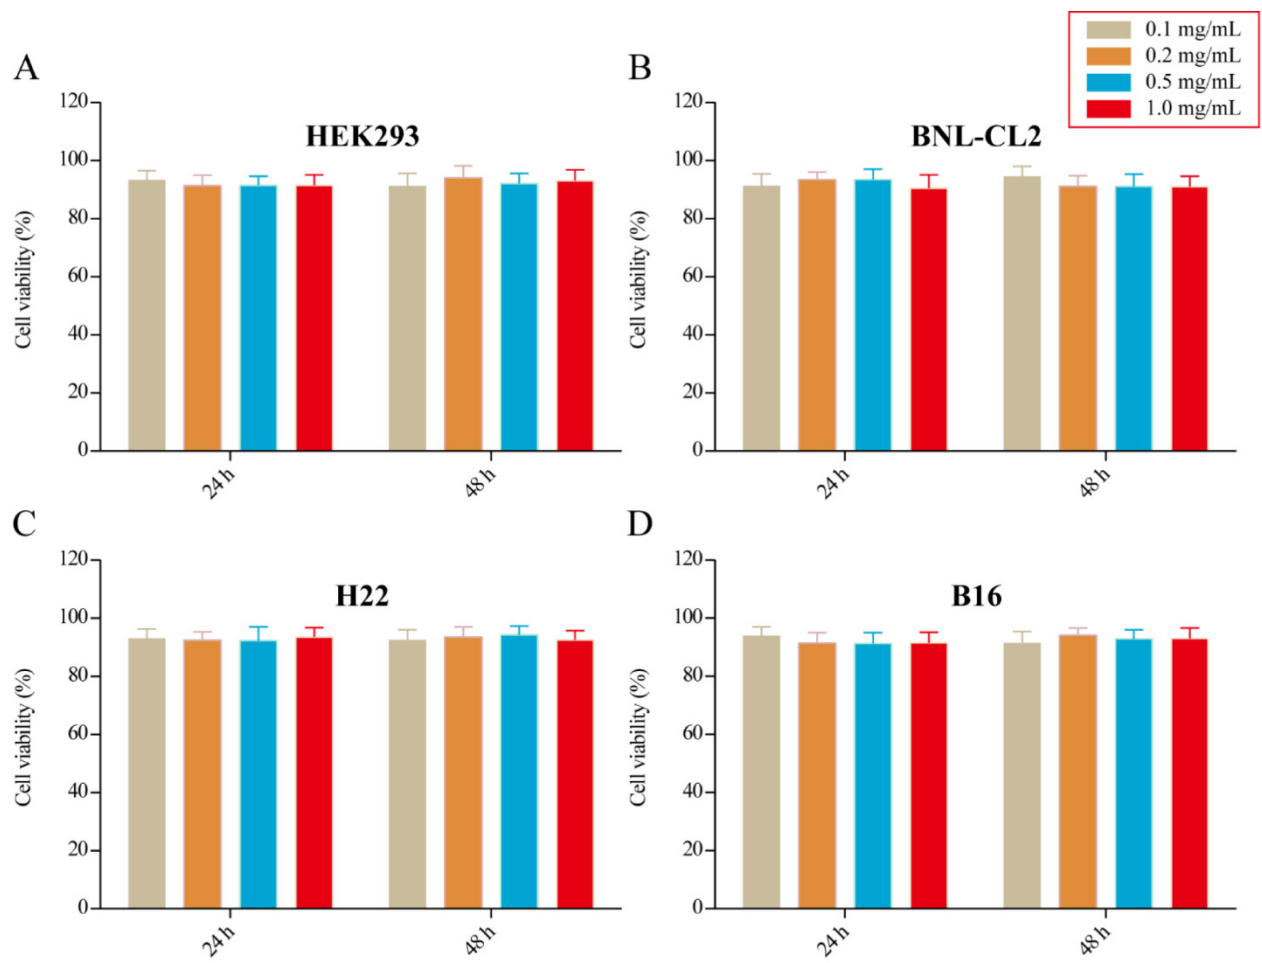

**Figure S7.** Cell toxicity assay of YQ26-FSiNPs on HEK293, BNL-CL2, H22, and B16 cells. Cell viability was measured every 24 h following incubation with various concentrations of YQ26-FSiNPs.

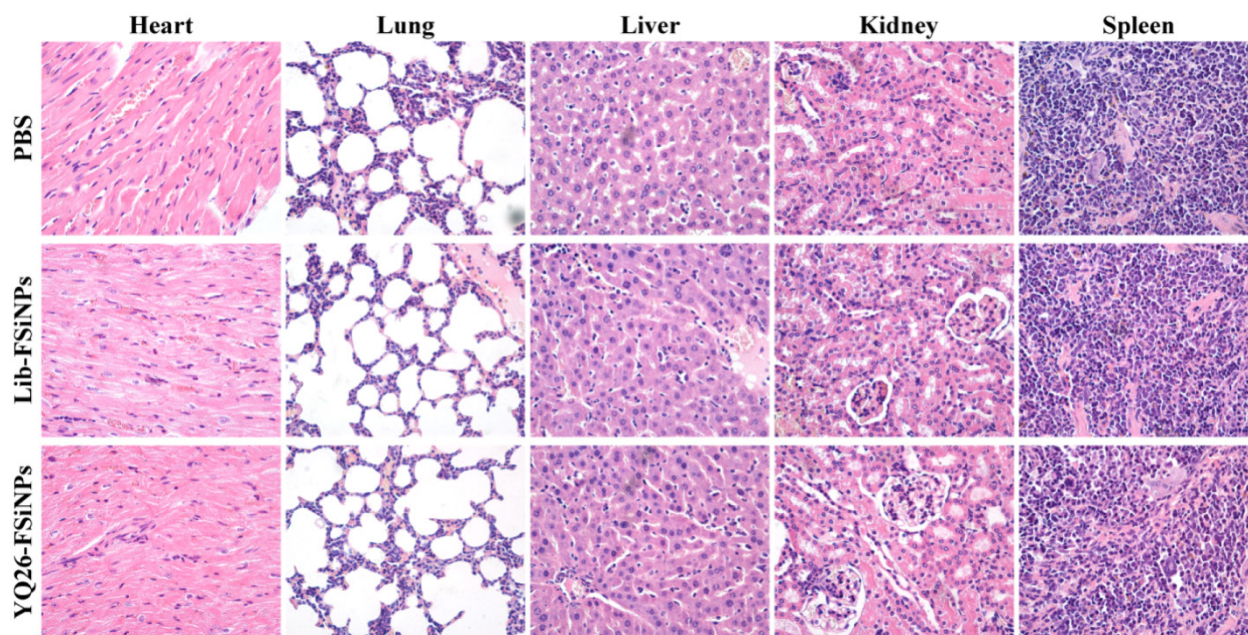

**Figure S8.** Tissue toxicity assay of mice treated with PBS (upper), Lib-FSiNPs (middle), YQ-FSiNPs (lower). Sections from major organs were stained with hematoxylin-eosin and examined by light microscopy (400 × original magnification).



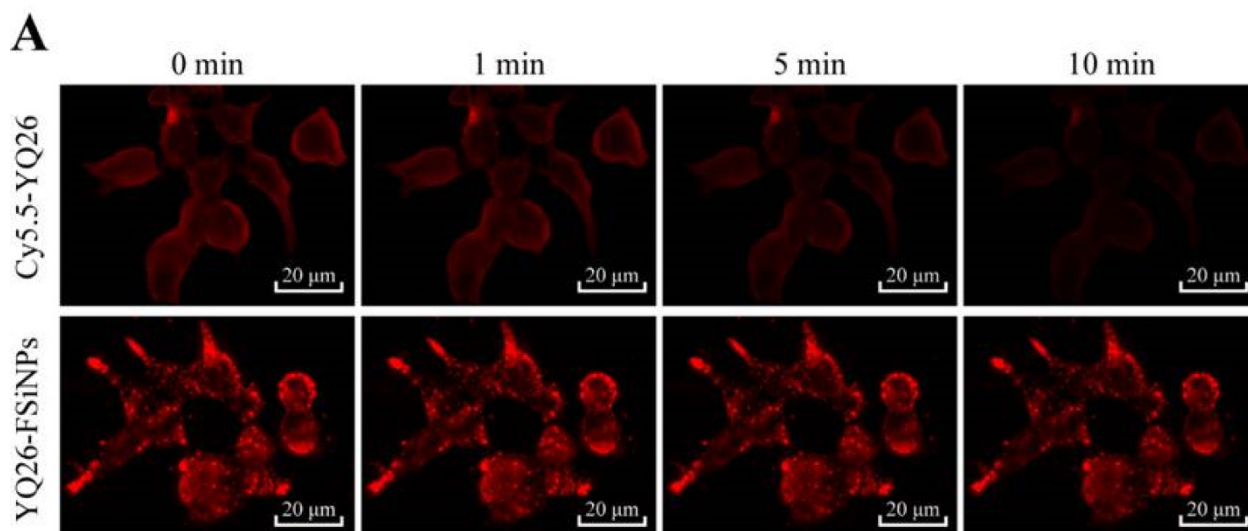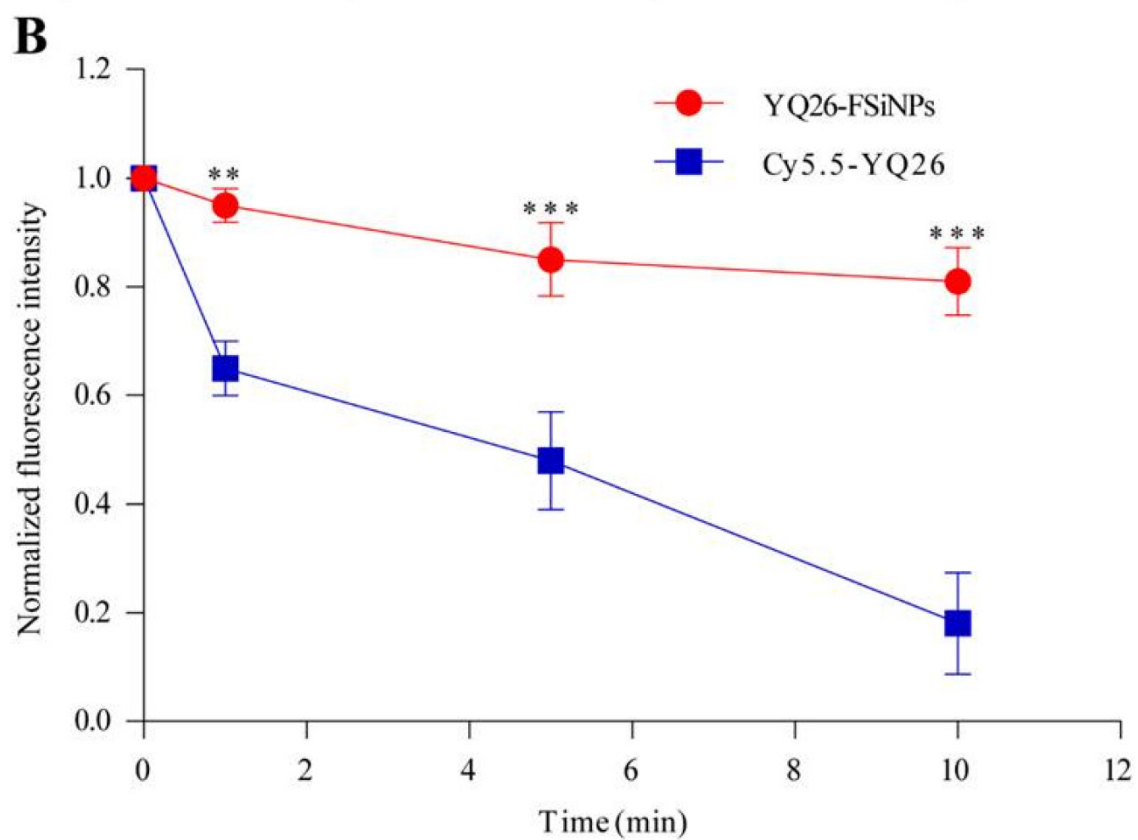

**Figure S9.** Fluorescence imaging (A) and quantification of photostability (B) of YQ26-FSiNPs and

Cy5.5-YQ26. Scale bar = 20  $\mu\text{m}$ . \*\*  $P < 0.01$ , \*\*\*  $P < 0.001$ .
